# Supplementary material for: Cerebrovascular function and its association with systemic artery function and stiffness in older adults with and without mild cognitive impairment
Source: Eur J Appl Physiol. 2022 May 6;122(8):1843–56. doi: 10.1007/s00421-022-04956-w (PMC9287231; doi:10.1007/s00421-022-04956-w)
Supplement: Supplementary file 1 — Supplementary file1 (DOCX 610 KB) [file 421_2022_4956_MOESM1_ESM.docx]

**ONLINE RESOURCES (supplementary materials)**

**Cerebrovascular function and its association with systemic artery function and stiffness in older adults with and without mild cognitive impairment**

Tom G. Bailey*1,2

Timo Klein*1,3

Annelise L. Meneses1

Kayla B. Stefanidis1

Stefanie Ruediger2,3

Daniel J. Green4

Tim Stuckenschneider1,3

Stefan Schneider#1,3

Christopher D. Askew#1,5

1 VasoActive Research Group, School of Health and Behavioural Sciences, University of the Sunshine Coast, Sippy Downs, QLD Australia.

2 Physiology and Ultrasound Laboratory in Science and Exercise, Centre forResearch on Exercise, Physical Activity and Health, School of Human Movement and Nutrition Sciences, The University of Queensland, Brisbane, QLD, Australia.

3 Institute of Movement and Neurosciences, German Sport University, Cologne, Germany.

4 School of Human Sciences, Faculty of Science, The University of Western Australia, WA, Australia.

5 Sunshine Coast Health Institute, Sunshine Coast Hospital and Health Service, Birtinya, QLD, Australia.

*Joint first authors

#Shared senior author responsibilities

**Corresponding author:**

Associate Professor Christopher D. Askew, PhD

School of Health and Behavioural Sciences, University of the Sunshine Coast, 90 Sippy Downs Drive, Sippy Downs QLD 4556, Australia.

Telephone: +61 7 5456 5961. E-mail: [caskew@usc.edu.au](mailto:caskew@usc.edu.au)


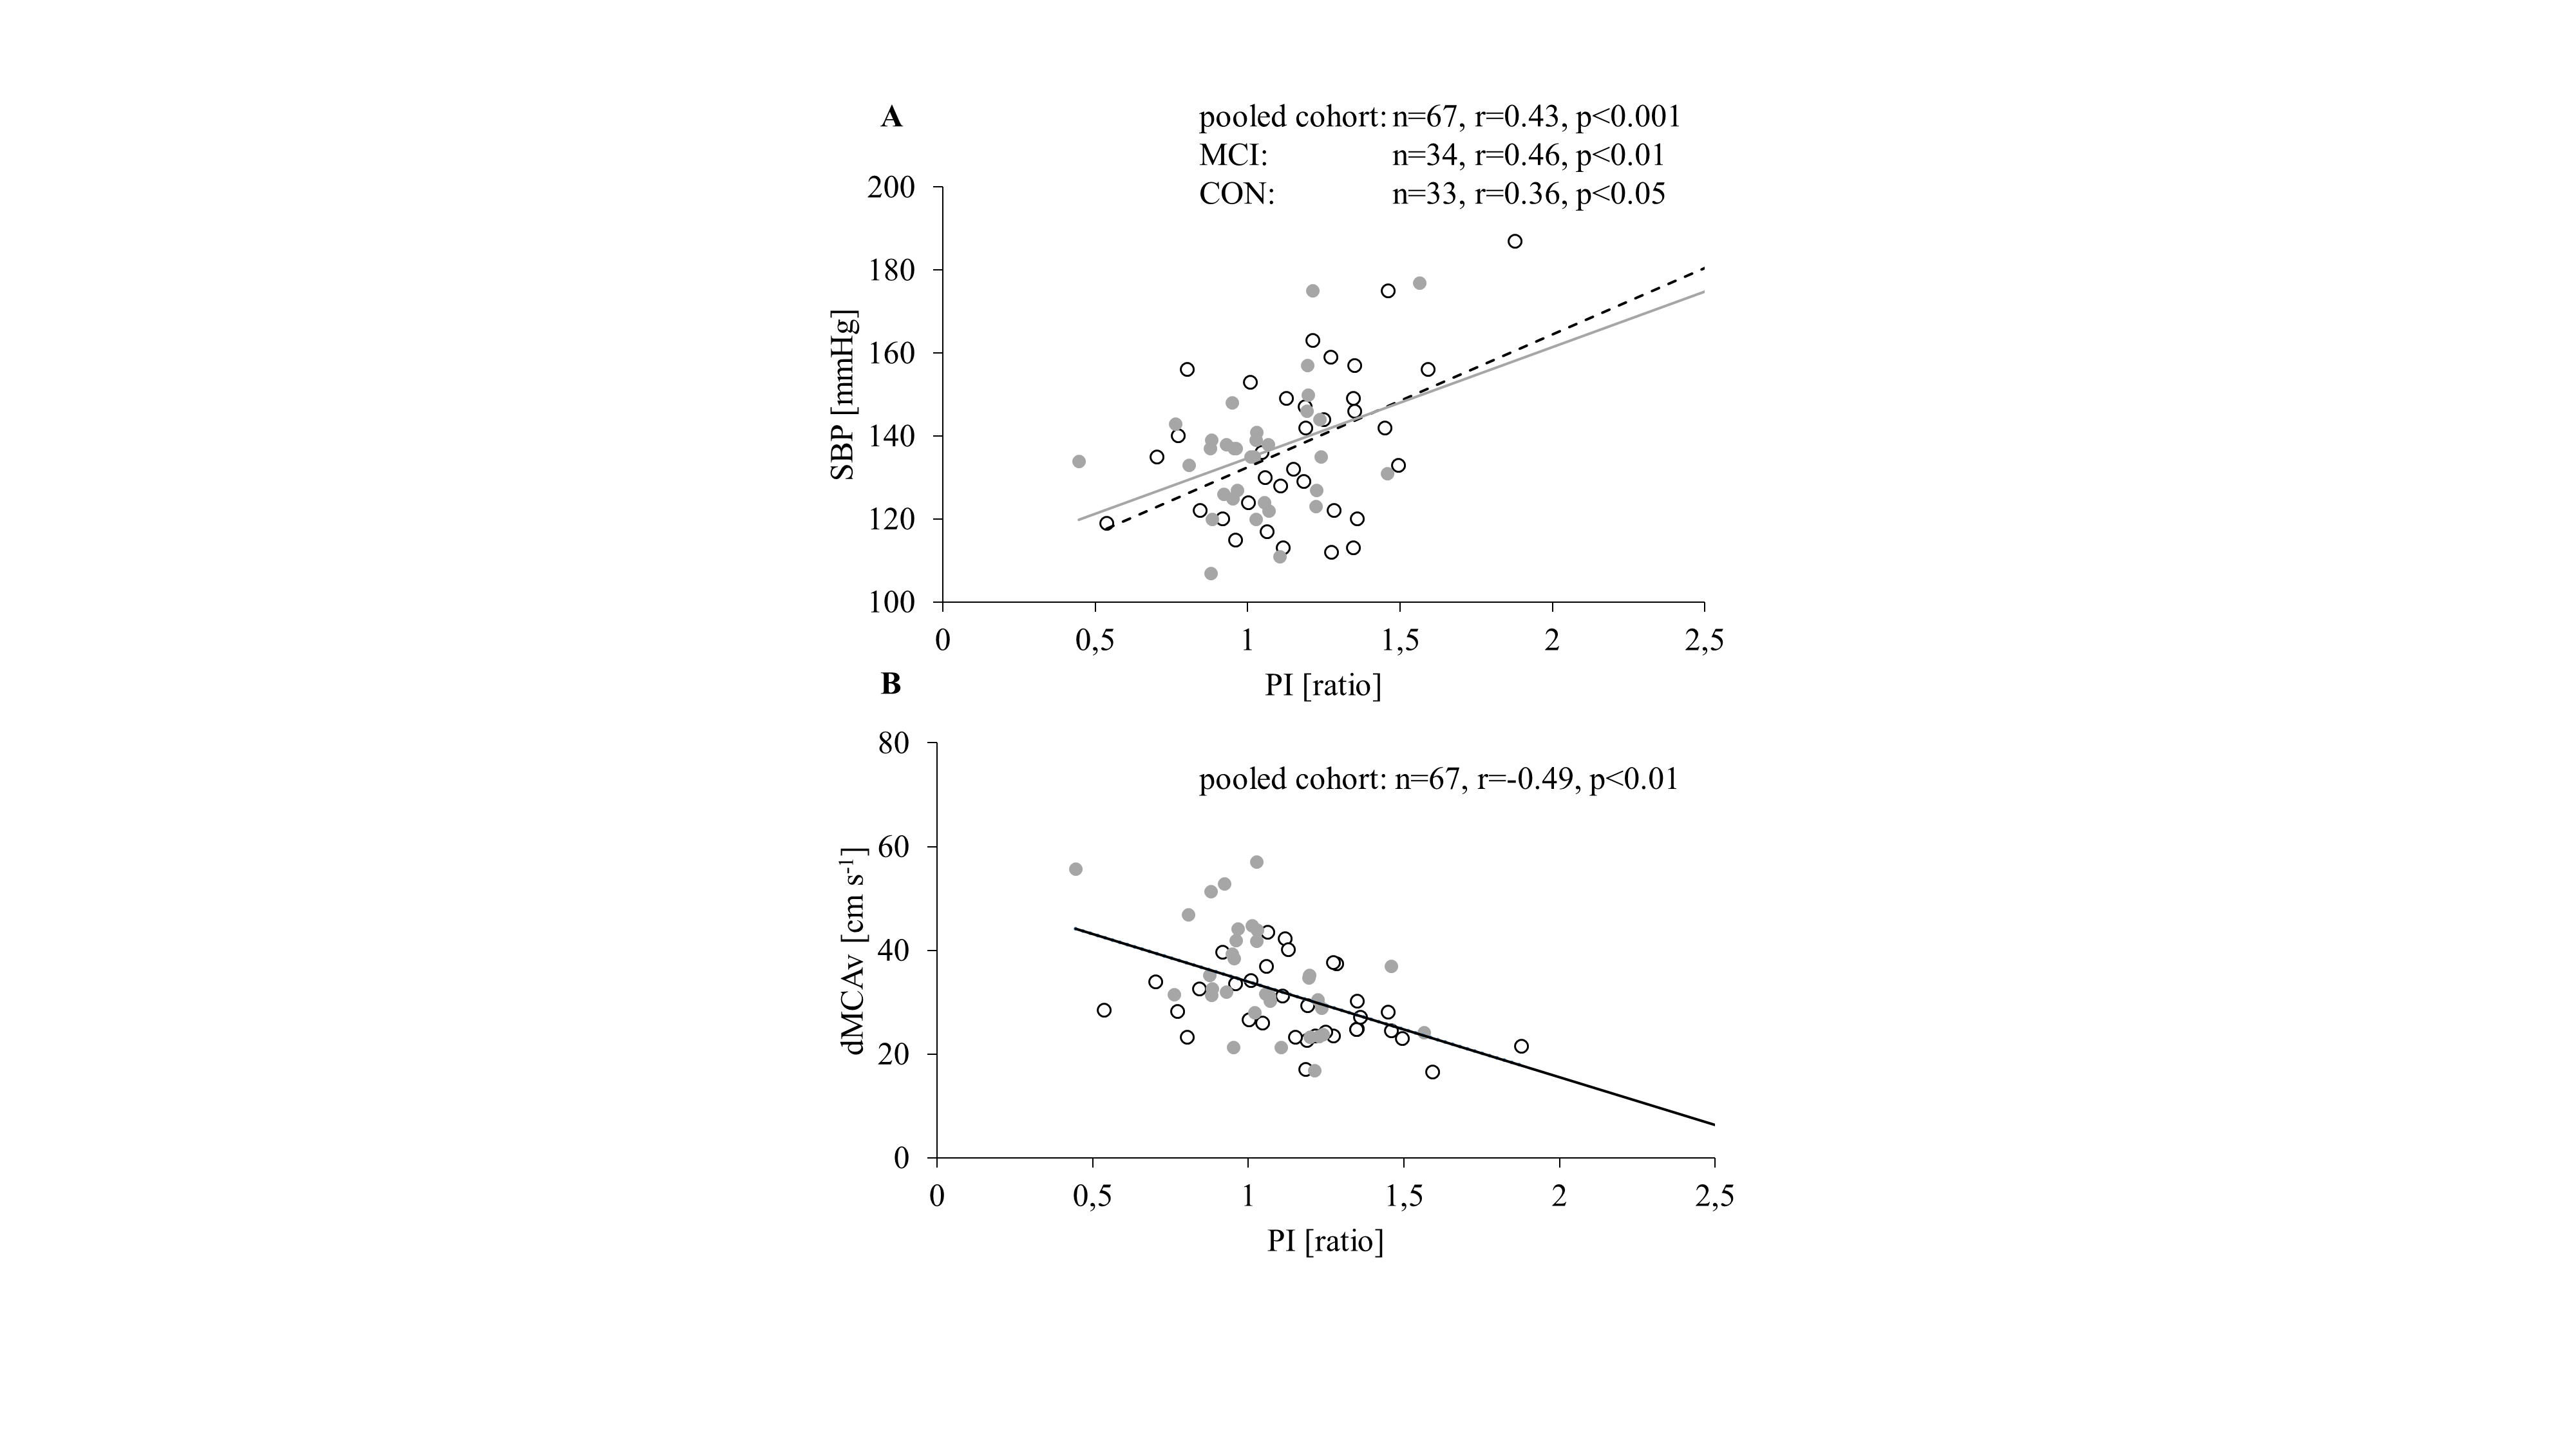


**Supplementary Figure 1**. Panel A: Correlation between systolic blood pressure (SBP) and cerebral pulsatility index (PI). Panel B: Correlation between diastolic middle cerebral artery velocity (dMCAv) and PI. Open circles are MCI and grey circles CON. The dashed line in A presents trend line for MCI and the grey line the trend for CON. Black line in B presents the trend for the full cohort.

**Supplementary Table 1. Cerebral and systemic vascular function measures in female and male participants**

| Variable | **Female** | | | **Male** | | |
| --- | --- | --- | --- | --- | --- | --- |
| MCI | CON | *p* value | MCI | CON | *p* value |
| Mean (95% CI) | Mean (95% CI) | Mean (95% CI) | Mean (95% CI) |
| MoCA (score) | 23.00 ± 2.13  (CI: 22.69-23.30); n=15 | 28.17 ± 1.38  (CI: 28.01-28.32); n=19 | **<0.001** | 22.30 ± 2.92  (CI: 22.08-22.52); n=26 | 27.50 ± 1.70  (CI: 27.26-27.73); n=14 | **<0.001** |
| **Cerebrovascular function measures** | | | | | | |
| MCAv supine rest (cm s-1) | 41.36 ± 9.66  (CI: 39.47-43.25); n=10 | 47.04 ± 14.17  (CI: 45.57-48.49); n=19 | 0.267 | 40.33 ± 11.04  (CI: 39.19-41.47); n=19 | 41.26 ± 9.35  (CI: 39.95-42.57); n=14 | 0.799 |
| CO2 reactivity –  (%cms-1 mmHg-2) | 2.92 ± 1.22  (CI: 2.67-3.15); n=10 | 2.79 ± 1.54  (CI: 2.63-2.94); n=19 | 0.826 | 2.15 ± 1.38  (CI: 2.02-2.29); n=20 | 2.71 ± 1.51  (CI: 2.50-2.92); n=14 | 0.273 |
| %MCA/%MAP (%%) | 1.10 ± 0.31  (CI: 1.04-1.15); n=11 | 1.60 ± 0.41  (CI: 1.55-1.64); n=19 | **0.001** | 1.33 ± 0.48  (CI: 1.29-1.37); n=23 | 1.37 ± 0.69  (CI: 1.27-1.46); n=14 | 0.865 |
| PI (ratio) | 1.17 ± 0.37  (CI: 1.10-1.24); n=11 | 0.99 ± 0.19  (CI: 0.97-1.01); n=19 | 0.087 | 1.16 ± 0.21  (CI: 1.14-1.18); n=23 | 1.10 ± 0.22  (CI: 1.07-1.13); n=14 | 0.400 |
| **Systemic vascular function measures** | | | | | | |
| FMD (%) | 4.74 ± 1.49  (CI: 4-68-5.20); n=13 | 5.83 ± 1.89  (CI: 5.81-6.23); n=19 | 0.128 | 4.08 ± 1.78  (CI: 4.03-4.31); n=26 | 4.50 ± 2.04  (CI: 4.32-4.92); n=14 | 0.496 |
| PWV (m.s-1) | 13.54 ± 2.47  (CI: 13.02-13.77); n=14 | 11.07 ± 3.08  (CI: 10.71-11.42); n=17 | **0.035** | 13.05 ± 2.17  (12.86-13.23); n=23 | 11.80  (11.57-12.03); n=13 | 0.075 |
| AIx75 (%) | 27.00 ± 7.49  (CI: 26.44-28.55); n=15 | 24.63 ± 7.70  (CI: 23.83-25.42); n=19 | 0.293 | 20.53 ± 11.86  (CI: 19.64-21.43); n=26 | 17.50 ± 9.57  (CI: 16.16-18.83); n=14 | 0.415 |
| SBP (mmHg) | 138.13 ± 19.09  (CI: 134.48-139.93); n=15 | 135.52 ± 13.52  (CI: 134.13-136.92); n=19 | 0.770 | 137.03 ± 17.99  (CI: 135.68-138.39); n=26 | 136.17 ± 17.25  (CI: 133.73-138.55); n=14 | 0.879 |
| DBP (mmHg) | 71.27 ± 8.61  (CI: 69.21-71.49); n=15 | 75.95 ± 10.09  (CI: 74.40-76.98); n=19 | 0.099 | 75.88 ± 10.12  (CI: 75.12-76.65); n=26 | 76.78 ± 9.59  (CI: 75.44-78.12); n=14 | 0.786 |

AIx, Augmentation index; DBP, diastolic blood pressure; MoCA, Montreal Cognitive Assessment, FMD, flow-mediated dilation; MCAv, middle cerebral artery flow velocity; PI, pulsatility index; PWV, pulse wave velocity; SBP, systolic blood pressure. MCI = mild cognitive impairment, CON = control.

**Supplementary Table 2. Correlations between cerebrovascular, systemic vascular outcomes and MoCA scores in MCI and control groups**

| Variable | **All** | | | **MCI** | | | **CON** | | |
| --- | --- | --- | --- | --- | --- | --- | --- | --- | --- |
| n | r | *p* | n | r | *p* | n | r | *p* |
| **Relationships between MoCA and systemic and cerebral measures** | | | | | | | | | |
| MoCA and FMD | 72 | 0.28 | **0.017** | 39 | 0.15 | 0.339 | 33 | 0.21 | 0.252 |
| MoCA and AIx | 74 | 0.01 | 0.947 | 41 | 0.08 | 0.606 | 33 | 0.17 | 0.351 |
| MoCA  and PWV | 67 | -0.22 | 0.068 | 37 | 0.17 | 0.314 | 30 | -0.03 | 0.864 |
| MoCA and MCAv (rest) | 62 | 0.29 | 0.018 | 29 | 0.25 | 0.174 | 33 | 0.16 | 0.358 |
| MoCA and %MCAv%MAP (stand-sit) | 67 | 0.23 | 0.059 | 34 | -0.15 | 0.428 | 33 | 0.39 | **0.026** |
| MoCA and %CO2reactivity | 63 | 0.06 | 0.601 | 30 | -0.16 | 0.392 | 33 | 0.03 | 0.849 |
| MoCA and PI | 67 | -0.19 | 0.114 | 34 | -0.02 | 0.897 | 33 | 0.04 | 0.826 |
| **Relationships between PI and systemic and cerebral measures** | | | | | | | | | |
| PI and FMD | 67 | 0.28 | **0.022** | 34 | 0.56 | **0.0001** | 33 | 0.23 | 0.19 |
| PI and Aix | 67 | -0.24 | 0.070 | 34 | -0.26 | 0.21 | 33 | -0.20 | 0.30 |
| PI and PWV | 62 | 0.16 | 0.21 | 32 | 0.06 | 0.72 | 30 | 0.14 | 0.46 |
| **Relationships between MCAv (rest) and systemic and cerebral measures** | | | | | | | | | |
| MCAv (rest) and FMD | 60 | 0.18 | 0.16 | 27 | 0.06 | 0.78 | 33 | 0.20 | 0.26 |
| MCAv (rest) and AIx | 62 | 0.16 | 0.23 | 29 | 0.22 | 0.28 | 33 | 0.09 | 0.63 |
| MCAv (rest) and PWV | 61 | 0.08 | 0.53 | 28 | 0.13 | 0.49 | 33 | 0.20 | 0.28 |
| **Relationships between %MCAv%MAP (stand-sit) and systemic and cerebral measures** | | | | | | | | | |
| %MCAv%MAP and FMD | 65 | 0.16 | 0.19 | 32 | -0.19 | 0.28 | 33 | 0.45 | 0.07 |
| %MCAv%MAP and AIx | 67 | 0.18 | 0.20 | 34 | 0.03 | 0.87 | 33 | 0.45 | **0.01** |
| %MCAv%MAP and PWV | 63 | 0.10 | 0.42 | 32 | 0.07 | 0.73 | 31 | 0.33 | 0.07 |
| **Relationships between %CO2reactivity and systemic and cerebral measures** | | | | | | | | | |
| %CO2reactivity and FMD | 61 | 0.08 | 0.51 | 28 | -0.12 | 0.54 | 33 | 0.16 | 0.36 |
| %CO2reactivity and AIx | 63 | 0.13 | 0.33 | 30 | 0.08 | 0.70 | 33 | 0.17 | 0.37 |
| %CO2reactivity and PWV | 59 | -0.02 | 0.84 | 28 | 0.09 | 0.63 | 31 | -0.05 | 0.77 |

AIx, Augmentation index; MoCA, Montreal Cognitive Assessment, FMD, flow-mediated dilation; MAP, mean arterial blood pressure; MCAv, middle cerebral artery flow velocity; PI, pulsatility index; PWV, pulse wave velocity. MCI = mild cognitive impairment, CON = control.
